# Supplementary material
Source: Springer Nature journal article supplement (https://www.springermedizin.de/resource/supplementary/12879_2011_2109_MOESM3_ESM.pdf/9443712)

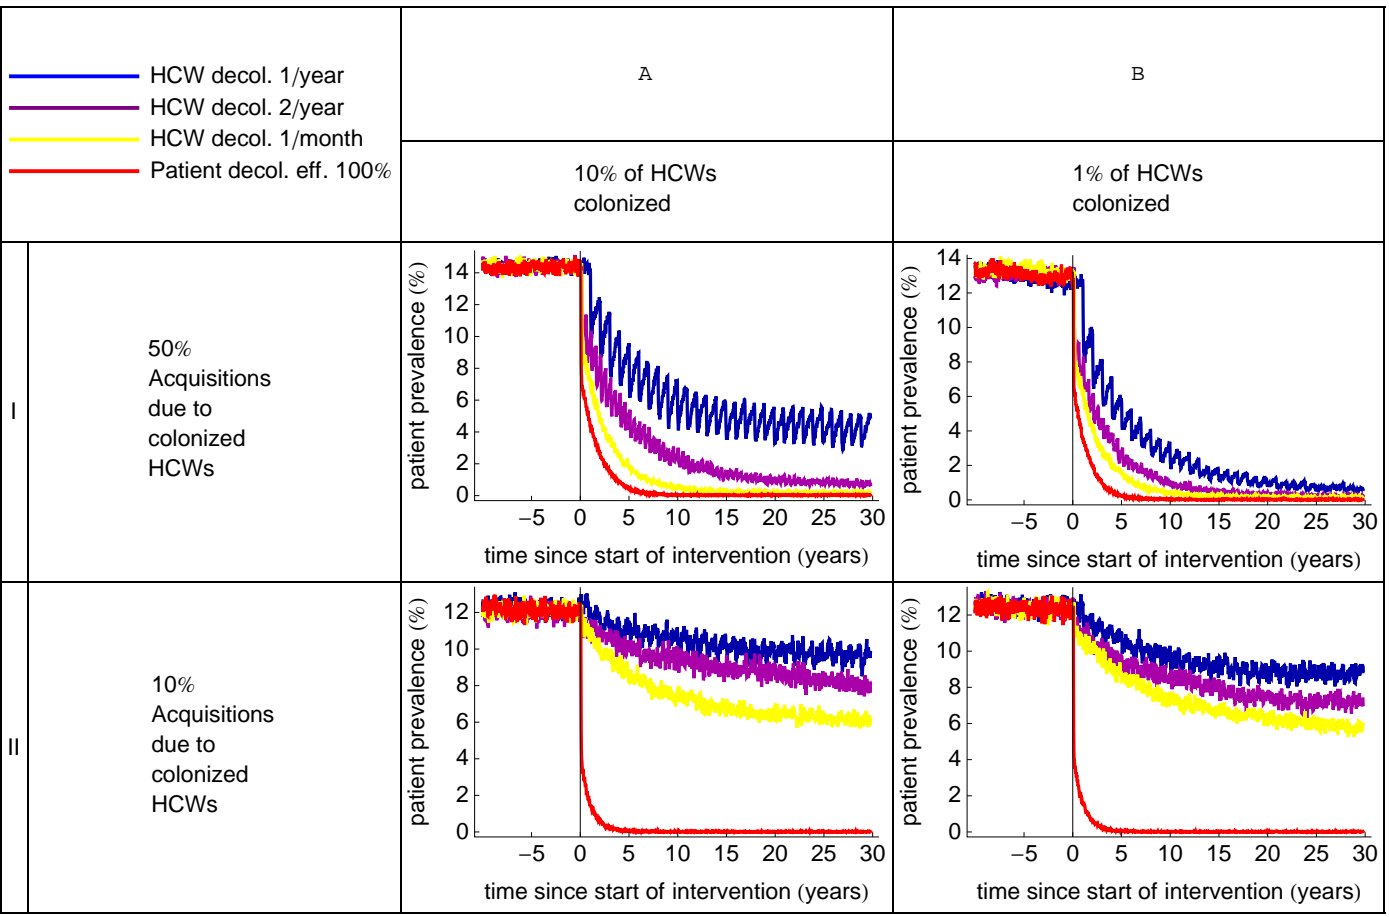

Supplement: MOESM3 [file 9443712]
